# Supplementary material
Source: PubMed Central journal article supplement (PMC7685209)
Supplement: bloodBLD2020005546-suppl1.pdf [file bloodBLD2020005546-suppl1.pdf]

## **SUPPLEMENTAL METHODS**

### **Cell lines and cell culture**

The Hodgkin lymphoma (HL) cell lines L428 (nodular sclerosis), L1236 (mixed cellularity), L540 (nodular sclerosis, T cell derived), HDLM2 (nodular sclerosis; T cell derived), KMH2 (mixed cellularity), L591 (nodular sclerosis, EBV+), DEV (nodular lymphocyte predominant (NLPHL)) and the diffuse large B cell lymphoma (DLBCL) cell line SUDHL6 were cultured as previously described.<sup>1,2</sup> Cell line ID was checked using DNA-based STR analysis with the powerplex 16 HS kit (Promega, Madison, WI, USA). Routinely performed mycoplasma tests were consistently negative. Human leukocyte antigen (HLA) typing of the HL cell lines was determined by SSOP (Immucor, Peachtree Corners, GA, USA) as described previously (Supplemental Table 1).<sup>3</sup> The high resolution typing results of the cell lines for HLA-DRB1 and HLA-DQB1 were confirmed using next generation sequencing.

### **Flow cytometry**

Flow cytometry was performed by incubating cells with antibodies against HLA-A,B,C, HLA-DP,DQ,DR, APC labeled antibody for HLA-DR and PE labeled antibodies for CD54 and CD58 for 30 minutes on ice. Unlabeled antibodies were followed by a goat anti-mouse IgG FITC. As a negative control the first antibody was omitted or isotype control antibodies were used. All antibodies used in this study are summarized in Supplemental Table 3. Samples were analyzed on a BD FACS Caliber flow cytometer (BD Biosciences) and analyzed using FlowJo version 10.6.1 software.

### **Healthy controls**

Six unmatched and nineteen HLA-II matched healthy donors were selected from a pool of HLA typed blood donors (Supplemental Table 2). The matching was based on HLA-II type of both PBMC donors and HL cell lines and was perfect at second field resolution, referring to matching based on the precise and unique HLA amino acid sequence according to the HLA nomenclature.<sup>4</sup> The only exception was KMH2, carrying the HLA-DRB1\*04:65 allele that is uncommon in Caucasians.

Peripheral blood mononuclear cells (PBMCs) were isolated from full blood of healthy donors using Ficoll-Paque (GE Healthcare, Chicago, IL, USA) following standard procedures. PBMCs were resuspended in FCS + 10% dimethyl sulfoxide (Sigma-Aldrich, Saint Louis, MO, USA) and frozen in liquid nitrogen. This study was approved by the Institutional Review Board of the UMCG (METC UMCG 2018/150) and all healthy donors gave informed consent. Each experiment was done with at least three different HLA-II unmatched or matched PBMC donors per cell line or condition.

### **Rosetting assay**

HL cell lines were incubated with PBMCs in a HL cell:PBMC ratio of 1:20 with  $1 \times 10^6$  PBMCs/mL RPMI 1640 medium supplemented with 10% FCS. A 1:50 ratio was only used for visualization purposes, because we observed some clustering of rosettes at a 1:20 ratio at longer co-culture times (e.g. 2-4h). Cells were incubated at 37°C for five minutes to four hours to allow the formation of rosettes. After incubation rosettes were gently resuspended, diluted and cytopspins were made using a CytoSpin 4 cytocentrifuge (ThermoFischer Scientific). For accurate counting of T cells within tumor cell rosettes both the shape of the nucleus and the size of the cells were considered to reliably discriminate lymphocytes from monocytes. In addition, in double staining experiments (see below) monocytes were excluded from the counts also based on their CD4dim staining pattern.<sup>5</sup> A rosette was defined as a cluster containing one tumor cell and three or more adherent lymphocytes. The number of rosettes was counted for at least 50 tumor cells by two individual observers. Infrequent tumor cell clumps of three or more tumor cells were excluded, as this influenced the formation of rosettes. To block the interaction between CD2 and CD58, cells were incubated with 5µg anti-human CD2 as described previously.<sup>6</sup> Enzyme-linked immunosorbent assay (ELISA) was used to measure interleukin-2 (IL-2) in supernatant of 18 hour co-culture experiments. Experiments to determine IL-2 production were performed in duplicate and the mean of duplicates was used. If samples were measured on different ELISA plates at least three control samples were taken along

and values were normalized to the control samples. ELISA was performed according to manufacturer's protocol (IL-2 kits: HS200 and DY202, R&D systems).

### **Immunofluorescence**

Cytospin slides were fixed with 4% paraformaldehyde (PFA) for 10 minutes, incubated with primary antibodies against CD2, TCR or CD11a and a secondary anti-mouse IgG Alexa Fluor 555 antibody. F-actin was stained with Phalloidin-iFluor 555 reagent. Nuclei were counterstained with 4',6-diamidino-2-phenylindole (DAPI) (1:1000, Invitrogen). Fluorescent signals were visualized using the Leica DM4000B (Wetzlar, Germany) microscope equipped with a Leica DFC345FX Camera using the LAS V4.8 imaging software. Overlays were made and brightness and contrast were adjusted using Fiji software.

### **Immunohistochemistry**

Immunohistochemistry was performed on cytopins and snap-frozen tissues of classical HL patients (cHL) using standard procedures. For CD8/CD4 double staining, cytopins were fixed in acetone and incubated with anti-CD8, followed by incubations with rabbit anti-mouse immunoglobulins/HRP, goat anti-rabbit immunoglobulins/HRP and visualized with diaminobenzidine (DAB). Subsequent staining for CD4 was done by incubating with anti-CD4, followed by incubations with goat anti-mouse IgG2a-biotin, streptavidin alkaline phosphatase and visualized using an alkaline phosphatase staining reaction. Appropriate positive and negative control slides were included. Single staining for CD20 and CD56 on cytopins was visualized using 3-amino-9-ethylcarbazole (AEC) after incubation with appropriate secondary and tertiary antibodies. This procedure was also used for CD2 and TCR staining on tissue sections that were cut from snap-frozen cHL tissue. Single stained slides were counterstained with hematoxylin.

### **Generation of CRISPR-Cas9 knockout cell lines**

Guide RNAs used to target CIITA, CD58 and CD54 were selected from the study of Abrahimi et al.<sup>7</sup> or designed using the online optimization software tool GuideScan (<http://www.guidescan.com/>) and the GPP sgRNA designer of the Broad Institute (<https://portals.broadinstitute.org/gpp/public/analysis-tools/sgrna-design>) (Supplemental Table 4). The single guide RNAs (sgRNAs) were cloned into the BsmBI restriction site in a modified lentiCRISPR v2 vector.<sup>8</sup> Lentiviral particles were produced after which L428 cells were infected as described previously.<sup>9-11</sup> Knockout (KO) efficiency was determined by flow cytometry of HLA-DR (to monitor efficiency of CIITA-KO), CD58 and CD54 using a FACS Caliber flow cytometer. HLA-DR, CD58 and CD54 negative cells were sorted by fluorescent activated cell sorting (FACS) using a SH800S sorter (Sony Biotechnology, San Jose, CA, USA) approximately 2-3 weeks after infection for further studies. The HL cell line L428 was selected to generate KOs as the lack of HLA-I expression in this cell line prevents bias that would likely be caused by activation of CD8+ T cells.

### **Proximity ligation assay**

A duolink in situ proximity ligation assay (PLA) kit was used to detect close proximity of molecules of interest according to manufacturer's instructions (DUO92102 and DUO92104, Sigma-Aldrich). The duolink PLA signal is generated only if the proteins of interest are within 40 nm and is therefore considered as a marker for a direct interaction. Antibodies used for PLA were mouse anti-human CD2, goat anti-human CD58/LFA-3, rabbit anti-human CD4 and mouse anti-human HLA-DP,DQ,DR. To study the interaction of the TCR with HLA-II we used a CD4 antibody in combination with a pan-HLA-II antibody as there were no appropriate antibodies for the TCR-HLA-II combination. CD4 is a good alternative as it binds together with the TCR to HLA-II. Slides were imaged using a Leica DM4000B microscope. PLA signals were quantified at the tumor cell T cell interface by determining the average number of signals per attached cell for every visualized rosette. As controls for noise, slides were included in which one of the two primary antibodies was omitted. These controls were consistently negative.

## Set-up of the *in vitro* model to study rosette formation

A short-term *in vitro* model system was developed and optimized using HLA-II unmatched PBMCs from healthy donors and HL cell lines. Read-out parameters included the percentage of tumor cells with rosettes (see representative example in Methods Figure 1A), the CD4 and CD8 T cell subsets present in the rosettes (see representative example in Methods Figure 1B), activation of T cells and relocalization of IS components.

The most optimal co-culture time point was determined, aiming for a percentage of tumor cells with rosettes that did not already reach a maximum to allow identification of potential differences between cell lines and conditions. For L428 we observed rosetting of PBMCs for 65, 77 and 85% of tumor cells after 15, 30 and 60 min respectively (Methods Figure 1C). A co-culture time of 30 minutes was chosen as the most optimal time point for subsequent experiments. At this time point the percentage of rosettes ranged from 47-80% for the different cHL cell lines. The percentage of rosetting around the NLPHL cell line DEV, the only cell line that lacked HLA-I, HLA-II and CD58 expression was lower with only 36% of tumor cells with rosettes (Methods Figure 1D). A much lower number of tumor cell rosettes was observed for the DLBCL cell line SUDHL6, corroborating the notion that massive rosetting is unique for HL. Double staining for CD4 and CD8 showed that approximately 60% of the rosetting cells were CD4+, 20% were CD8+ and 20% were CD4-CD8- cells. No clear differences were observed between the HL cell lines (Methods Figure 1E). The CD4-CD8- cell population is a mixture of NK cells (CD56+) and B cells (CD20+). TCR mediated activation of T cells was assessed by measuring IL-2 levels in the culture supernatant. PBMCs of all five donors responded to L428, L1236 and L591 by producing IL-2 (Methods Figure 1F). Three out of five donors produced IL-2 in response to L540, while hardly any responses were observed upon co-culture with HDLM2, SUPHD1, KMH2 and DEV.

Immunofluorescence was used to study F-actin polymerization in tumor cells and relocalization of IS components in T cells upon rosetting. For this analysis we used co-culture times

varying between 5 min and 4h. F-actin polymerization was prominent in tumor cells and increased over time. It presented as spider-web like structures stretching out towards the T cells (Methods Figure 2A). For CD2 on T cells, a clear relocalization to the physical interface with tumor cells was observed already at five minutes and lasting up to four hours. This relocalization occurred in response to the HL cell lines that are CD58 positive, but not in the context of CD58 negative cell lines (Methods Figure 2B). No relocalization of CD11a nor TCR was observed.

The model and read-out parameters described above were also used to study the effect of IS component KOs with HLA-II unmatched PBMCs (Methods Figure 3). In general effects observed with unmatched PBMCs were similar to matched PBMCs.

### **Statistical analysis**

Data are represented for all individual PBMC donors and either displayed separately or as mean of PBMC donors plus standard deviation. Statistical significance was calculated with GraphPad Prism 7.02 using a one-tailed paired t-test if different conditions employed on the same cell line were compared or a one-tailed Mann-Whitney U test if different cell lines are compared. The one-tailed test was done with the hypothesis that the interventions would decrease rosette formation and T cell activation. Values  $P < 0.05$  were considered statistically significant.

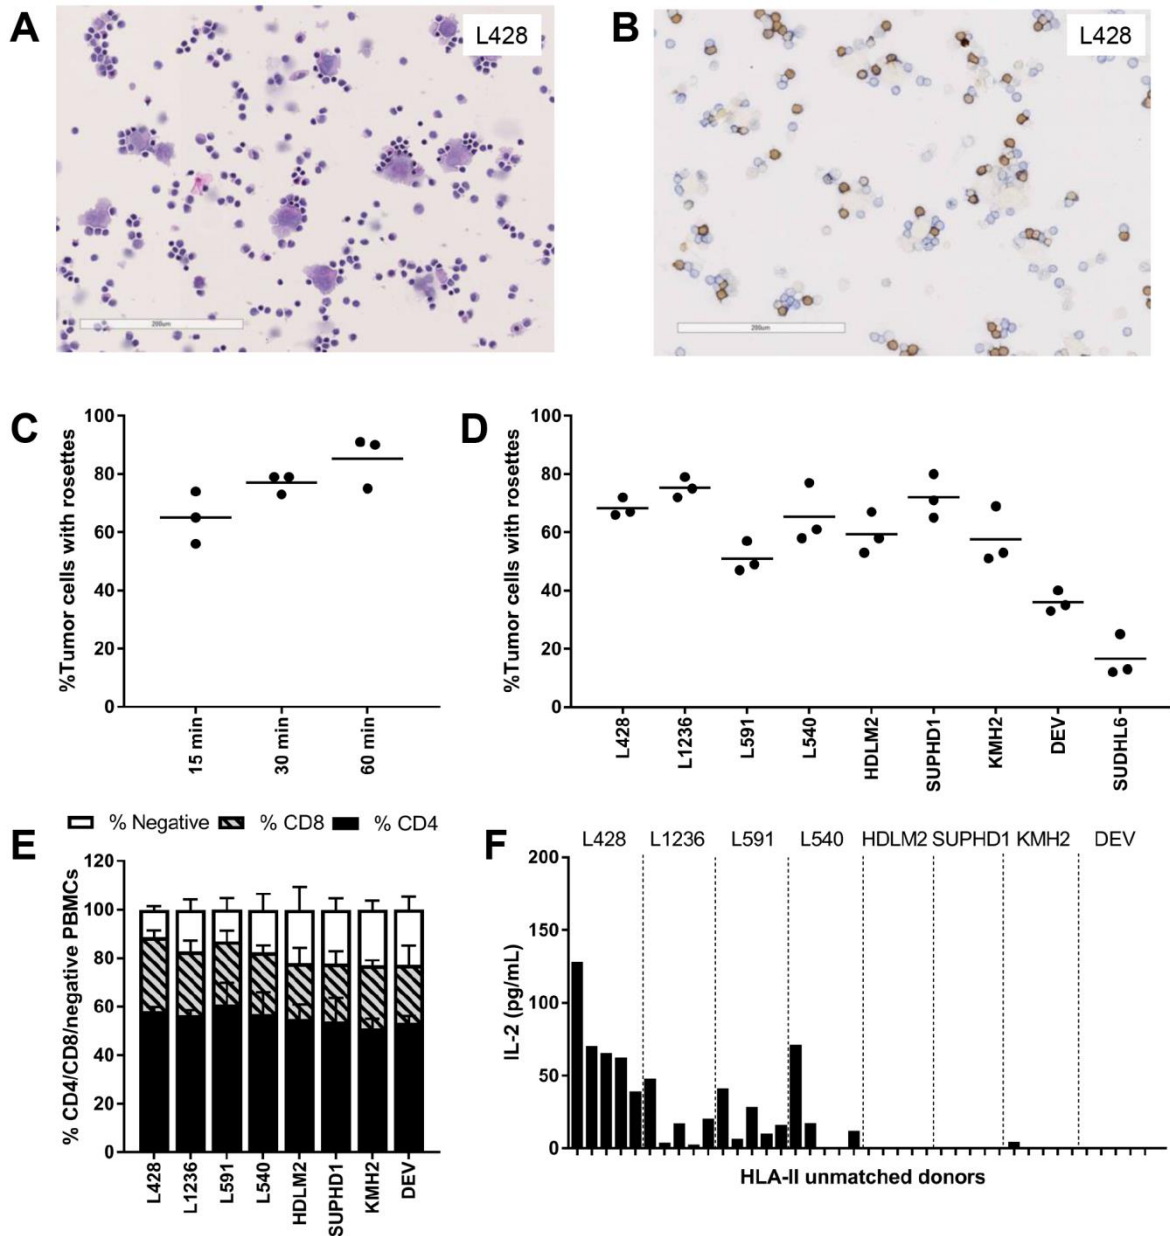

**Methods Figure 1. An *in vitro* model to study T cell rosetting of HLA-II unmatched PBMCs with HL cell lines.** (A) Hematoxylin and eosin staining of rosettes after a 30 minute co-culture of L428. (B) CD4 (blue) and CD8 (brown) double staining after a 30 minute co-culture of L428. (C) The percentage of L428 cells with rosettes quantified after 15, 30 or 60 minutes of co-culture. (D) The percentage of tumor cells with rosettes for different HL cell lines and as a control the DLBCL cell line SUDHL6 upon co-culture for 30 minutes. SUDHL6 cells expressed all components of the immunological synapse. (E) The percentage of CD4+, CD8+ and CD4-CD8- cells present in rosettes of HL cell lines co-cultured for 30 minutes. Data is presented as mean of different donors plus standard deviation. In panels C-E the experiments were performed with three different unmatched donors, which were the same for all cell lines. (F) IL-2 production of unmatched PBMCs in response to different HL cell lines. Each bar represents a single donor. The same five donors were used for all HL cell lines and presented in the same order.

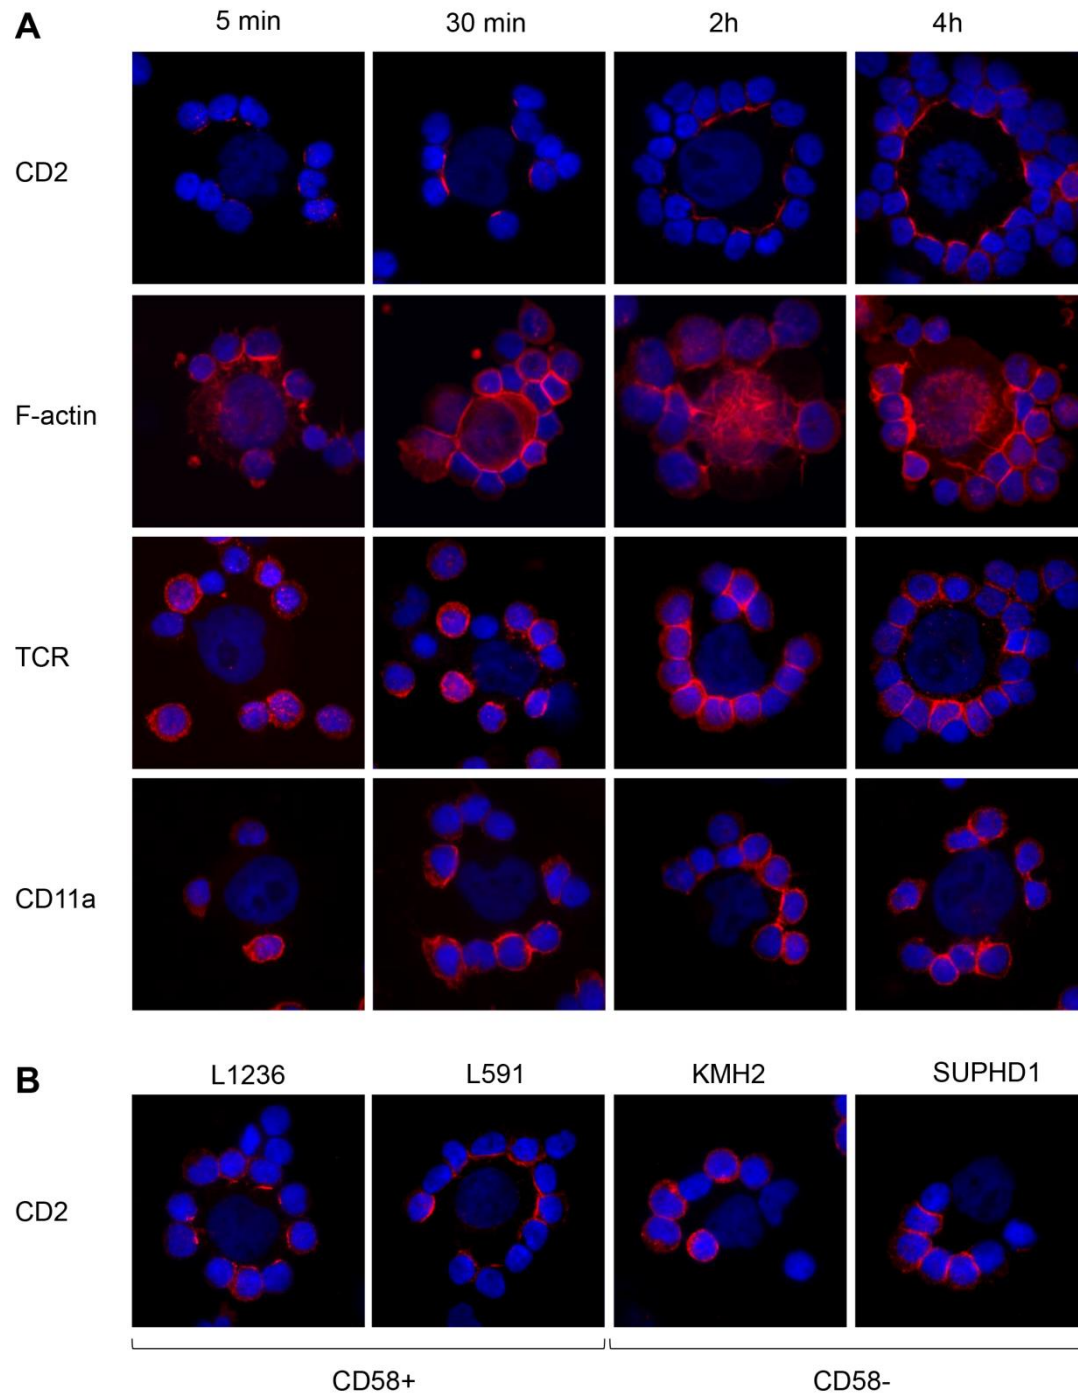

**Methods Figure 2. Relocalization of immunological synapse components in response to HL cell lines using HLA-II unmatched PBMCs.** (A) Immunological synapse components CD2, F-actin, TCR and CD11a were stained (red signal) upon co-culture of PBMCs with L428 for four different incubation times. (B) CD2 staining (red signal) on PBMCs co-cultured with CD58 positive L1236 and L591 or CD58 negative KMH2 and SUPHD1 cell lines. Clear relocalization of CD2 can be observed as discrete red signals at the interface between T cells and tumor cells using CD58 positive cell lines in contrast to the homogenous circumferential staining of entire T cells using CD58 negative cell lines. Relocalization of F-actin in L428 tumor cells presented as spider-web like structures stretching out towards the T cells. Representative images are shown at a 400x magnification.



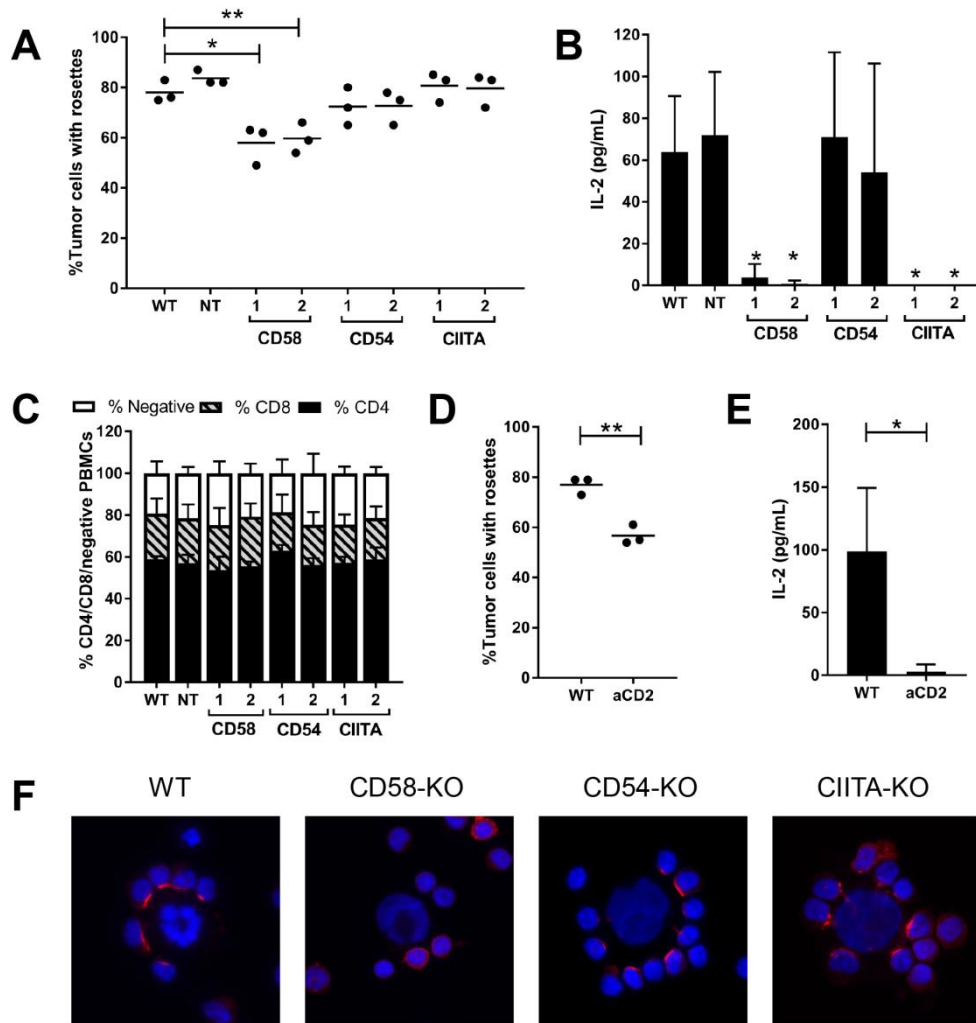

**Methods Figure 3. Relevance of HLA-II, CD58 and CD54 in adhesion and activation of rosetting T cells using HLA-II unmatched PBMCs.** (A) The percentage of tumor cells with rosettes upon co-culture of L428 wild-type (WT), non-targeting control (NT), CD58-KO, CD54-KO or CIITA-KO cell lines with PBMCs for 30 minutes. (B) IL-2 production by PBMCs in response to L428 WT, NT, CD58-KO, CD54-KO and CIITA-KO cell lines. (C) The percentage CD4+, CD8+ and CD4-CD8- cells present in rosettes upon co-culture of L428 WT, NT, CD58-KO, CD54-KO or CIITA-KO cell lines with PBMCs for 30 minutes. (D) The percentage of tumor cells with rosettes upon a 30 minute co-culture of L428 with untreated or anti-CD2 (aCD2) blocking antibody treated PBMCs. (E) IL-2 production of PBMCs co-cultured with L428 cells in the absence or presence of an aCD2 blocking antibody. (F) CD2 staining (red signal) of WT, CD58-KO, CD54-KO or CIITA-KO L428 cells co-cultured with PBMCs. Nuclei were counterstained with DAPI (blue signal). Clear relocalization of CD2 can be observed as discrete red signals at the interface between T cells and WT, CD54-KO and CIITA-KO tumor cells in contrast to the homogenous circumferential staining of entire T cells in CD58-KO cells. Representative images are shown at a 400x magnification. All experiments were performed with at least three different unmatched PBMC donors. Statistics were calculated using a one-tailed paired t-test compared to the WT. Values  $P < 0.05$  were considered statistically significant. \* $P < 0.05$ ; \*\* $P < 0.01$ .

## SUPPLEMENTAL REFERENCES

1. Liu Y, Abdul Razak FR, Terpstra M, et al. The mutational landscape of hodgkin lymphoma cell lines determined by whole-exome sequencing. *Leukemia*. 2014;28(11):2248-2251.
2. de Jong MRW, Langendonk M, Reitsma B, et al. WEE1 inhibition synergizes with CHOP chemotherapy and radiation therapy through induction of premature mitotic entry and DNA damage in diffuse large B-cell lymphoma. *Ther Adv Hematol*. 2020;11:2040620719898373.
3. Huang X, Kushekhar K, Nolte I, et al. HLA associations in classical hodgkin lymphoma: EBV status matters. *PLoS One*. 2012;7(7):e39986.
4. The IPD-IMGT/HLA database. HLA nomenclature. <https://www.ebi.ac.uk/ipd/imgt/hla/nomenclature/index.html>. Accessed on: 20 April 2020.
5. Filion LG, Izaguirre CA, Garber GE, Huebsh L, Aye MT. Detection of surface and cytoplasmic CD4 on blood monocytes from normal and HIV-1 infected individuals. *J Immunol Methods*. 1990;135(1-2):59-69.
6. Fromm JR, Kussick SJ, Wood BL. Identification and purification of classical hodgkin cells from lymph nodes by flow cytometry and flow cytometric cell sorting. *Am J Clin Pathol*. 2006;126(5):764-780.
7. Abrahimi P, Chang WG, Kluger MS, et al. Efficient gene disruption in cultured primary human endothelial cells by CRISPR/Cas9. *Circ Res*. 2015;117(2):121-128.
8. Wallace J, Hu R, Mosbrugger TL, et al. Genome-wide CRISPR-Cas9 screen identifies MicroRNAs that regulate myeloid leukemia cell growth. *PLoS One*. 2016;11(4):e0153689.
9. Dzikiewicz-Krawczyk A, Kok K, Slezak-Prochazka I, et al. ZDHHC11 and ZDHHC11B are critical novel components of the oncogenic MYC-miR-150-MYB network in burkitt lymphoma. *Leukemia*. 2017;31(6):1470-1473.

10. Yuan Y, Kluiver J, Koerts J, et al. miR-24-3p is overexpressed in hodgkin lymphoma and protects hodgkin and reed-sternberg cells from apoptosis. *Am J Pathol.* 2017;187(6):1343-1355.

11. Yuan Y, Niu F, Nolte IM, et al. MicroRNA high throughput loss-of-function screening reveals an oncogenic role for miR-21-5p in hodgkin lymphoma. *Cell Physiol Biochem.* 2018;49(1):144-159.

**SUPPLEMENTAL TABLES**

**Supplemental Table 1. HLA typing results of Hodgkin lymphoma cell lines**

| Cell line | HLA-A |    | HLA-B |    | HLA-C |    | HLA-DRB1 |       | HLA-DQB1 |       |
|-----------|-------|----|-------|----|-------|----|----------|-------|----------|-------|
| L1236     | 02    |    | 51    |    | 02    |    | 14:54    |       | 05:03    |       |
| L428      | 03    |    | 35    |    | 04    |    | 12:01    |       | 03:01    |       |
| L540      | 03    | 11 | 51    |    | 02    | 15 | 04:04    | 11:01 | 03:01    | 03:02 |
| HDLM2     | 01    | 02 | 08    | 44 | 05    | 07 | 13:01    | 15:01 | 06:02    | 06:03 |
| L591      | 01    | 33 | 08    | 35 | 04    | 07 | 03:01    |       | 02:01    |       |
| SUPHD1    | 01    |    | 38    |    | 12    |    | 13:01    |       | 06:03    |       |
| KMH2      | 11    | 24 | 52    | 62 | 04    | 12 | 04:65    | 11:01 | 03:01    | 03:02 |
| DEV       | 02    |    | 44    | 60 | 10    | 05 | 04:01    | 15:01 | 06:02    | 03:01 |

Missing alleles either represent homozygosity for the indicated allele or loss of heterozygosity.

**Supplemental Table 2. HLA genotype of healthy PBMC donors**

| Donor | HLA-A |    | HLA-B |    | HLA-C |    | HLA-DRB1           |       | HLA-DQB1 |       | Matched to cell line |
|-------|-------|----|-------|----|-------|----|--------------------|-------|----------|-------|----------------------|
| UC01  | 02    | 68 | 53    | 61 | 02    | 04 | 13:01              | 13:02 | 06:03    | 06:04 | <i>Unmatched</i>     |
| UC02  | 02    | 31 | 27    | 57 | 02    | 06 | 04:01              | 07:01 | 03:02    | 03:03 | <i>Unmatched</i>     |
| UC03  | 02    | 24 | 62    |    | 03    |    | 04:01              |       | 03:02    |       | <i>Unmatched</i>     |
| UC04  | 31    |    | 51    | 60 | 03    |    | 04:04              | 11:04 | 03:01    | 03:02 | <i>Unmatched</i>     |
| UC05  | 24    | 30 | 13    | 51 | 06    | 14 | 07:01              | 09:01 | 02:02    | 03:03 | <i>Unmatched</i>     |
| UC06  | 01    | 25 | 08    | 18 | 07    |    | 11:04              | 15:01 | 03:01    | 06:02 | <i>Unmatched</i>     |
| MC01  | 02    | 11 | 51    | 55 | 05    | 09 | 13:01              | 14:54 | 05:03    | 06:03 | L1236                |
| MC02  | 26    | 68 | 35    | 51 | 04    | 15 | 01:01              | 14:54 | 05:01    | 05:03 | L1236                |
| MC03  | 02    | 03 | 44    | 55 | 04    | 05 | 13:01              | 14:54 | 05:03    | 06:03 | L1236                |
| MC04  | 24    | 32 | 44    | 51 | 05    | 15 | 01:01              | 12:01 | 03:01    | 05:01 | L428                 |
| MC05  | 01    | 02 | 07    | 44 | 05    | 07 | 12:01              | 15:01 | 03:01    | 06:02 | L428                 |
| MC06  | 32    | 68 | 07    | 44 | 05    | 07 | 12:01              | 15:01 | 03:01    | 06:02 | L428                 |
| MC07  | 01    | 23 | 08    | 49 | 07    |    | 04:04 <sup>+</sup> | 11:01 | 03:01    | 03:02 | L540 and KMH2        |
| MC08  | 02    |    | 37    | 62 | 10    | 06 | 04:04 <sup>+</sup> | 11:01 | 03:01    | 03:02 | L540 and KMH2        |
| MC09  | 02    | 29 | 51    | 60 | 02    | 10 | 04:04 <sup>+</sup> | 11:01 | 03:01    | 03:02 | L540 and KMH2        |
| MC10  | 11    | 68 | 35    | 71 | 04    | 07 | 04:01 <sup>+</sup> | 11:01 | 03:01    | 03:02 | KMH2                 |
| MC11  | 02    | 68 | 07    | 08 | 07    | 07 | 13:01              | 15:01 | 06:02    | 06:03 | HDLM2                |
| MC12  | 03    | 68 | 07    | 61 | 02    | 07 | 13:01              | 15:01 | 06:02    | 06:03 | HDLM2                |
| MC13  | 02    | 26 | 27    | 62 | 02    | 09 | 13:01              | 15:01 | 06:02    | 06:03 | HDLM2                |
| MC14  | 01    | 03 | 08    |    | 07    |    | 03:01              |       | 02:01    |       | L591                 |
| MC15  | 01    | 11 | 08    | 35 | 04    | 07 | 03:01              |       | 02:01    |       | L591                 |
| MC16  | 01    | 03 | 08    | 35 | 04    | 07 | 01:01              | 03:01 | 02:01    | 05:01 | L591                 |
| MC17  | 24    | 30 | 13    | 38 | 06    | 12 | 11:01              | 13:01 | 06:03    | 03:01 | SUPHD1               |
| MC18  | 01    | 31 | 08    | 38 | 07    | 12 | 03:01              | 13:01 | 02:01    | 06:03 | SUPHD1               |
| MC19  | 01    | 02 | 08    | 62 | 09    | 07 | 03:01              | 13:01 | 02:01    | 06:03 | SUPHD1               |

<sup>+</sup>KMH2 has an uncommon HLA-DRB1\*04:65 and was therefore matched with HLA-DRB1\*04:01 or HLA-DRB1\*04:04 PBMC donors. HLA-DRB1\*04:04 has three and HLA-DRB1\*04:01 has four amino acids difference in exon-2 with HLA-DRB1\*04:65. Green indicates a perfect second field match.

**Supplemental Table 3. Antibodies used during this study**

| <b>Antibody name</b>                                                           | <b>Clone</b> | <b>Dilution</b> | <b>Application</b>          | <b>Company</b>                                |
|--------------------------------------------------------------------------------|--------------|-----------------|-----------------------------|-----------------------------------------------|
| Purified anti-human HLA-A,B,C                                                  | W6/32        | 1:500           | FC                          | Biolegend<br>(San Diego, CA, USA)             |
| Mouse anti-human HLA-DP,DQ,DR                                                  | CR3/43       | 1:200           | FC<br>PLA                   | Dako<br>(Santa Clara, CA, USA)                |
| APC anti-human HLA-DR                                                          | L243         | 1:20            | FC                          | Biolegend                                     |
| CD54 (ICAM-1) monoclonal antibody PE                                           | HA58         | 1:40            | FC                          | ThermoFisher Scientific<br>(Waltham, MA, USA) |
| PE mouse anti-human CD58                                                       | 1C3          | 1:20            | FC                          | BD Biosciences<br>(San Jose, CA, USA)         |
| Goat anti-mouse IgG, Human ads-FITC                                            | Polyclonal   | 1:100           | FC                          | Southern Biotech<br>(Birmingham, AL, USA)     |
| APC mouse IgG2a,κ isotype ctrl antibody                                        | MPOC-173     | 1:160           | FC                          | Biolegend                                     |
| Mouse IgG1 kappa isotype control PE                                            | P3.6.2.8.1   | 1:160           | FC                          | ThermoFisher Scientific                       |
| PE mouse IgG2a, κ isotype control                                              | G155-178     | 1:20            | FC                          | BD Biosciences                                |
| Purified mouse anti-human CD2                                                  | RPA-2.10     | 5 µg<br>1:50    | <i>In vitro</i><br>PLA, IHC | BD Biosciences                                |
| Human CD58/LFA-3 antibody                                                      | Polyclonal   | 1:50            | PLA                         | R&D Systems<br>(Minneapolis, MN, USA)         |
| Anti-CD4 antibody                                                              | EPR6855      | 1:50            | PLA                         | Abcam (Cambridge, UK)                         |
| Mouse anti-human CD2                                                           | OKT11        | Undiluted       | IF                          | Cell culture supernatant<br>ATCC® CRL-8027™   |
| Mouse anti-human CD11a                                                         | LFA1/2       | 1:100           | IF                          | Sanquin<br>(Amsterdam, NL)                    |
| Mouse anti-human TCR                                                           | W4F.5B       | Undiluted       | IF                          | Cell culture supernatant<br>ATCC® HB-9282™    |
| Donkey anti-mouse IgG (H+L) highly cross-adsorbed Secondary antibody Alexa 555 | Polyclonal   | 1:100           | IF                          | ThermoFisher Scientific                       |
| Phalloidin-iFluor 555 reagent – cytopainter                                    | -            | 1:1000          | IF                          | Abcam                                         |
| Purified mouse anti-human CD8                                                  | MCD8         | 1:10            | IHC                         | IQ Products<br>(Groningen, NL)                |
| Purified mouse anti-human CD4                                                  | Edu-2        | 1:10            | IHC                         | IQ Products                                   |
| Purified mouse anti-human CD56                                                 | MOC-1        | 1:5             | IHC                         | IQ Products                                   |
| Purified mouse anti-human CD20                                                 | B-ly 1       | 1:5             | IHC                         | IQ Products                                   |
| Rabbit anti-mouse IgG/HRP                                                      | Polyclonal   | 1:100           | IHC                         | Dako                                          |
| Goat anti-rabbit IgG/HRP                                                       | Polyclonal   | 1:100           | IHC                         | Dako                                          |
| Goat anti-mouse IgG2a biotin                                                   | Polyclonal   | 1:100           | IHC                         | Southern Biotech                              |
| Streptavidin alkaline phosphatase                                              | Polyclonal   | 1:300           | IHC                         | Dako                                          |

**Supplemental Table 4. Sequences of single guide RNAs used in this study**

| Guide RNA    | Exon | Strand    | Sequence 5'→3' *                  |
|--------------|------|-----------|-----------------------------------|
| CIITA sgRNA1 | 3    | Sense     | <b>CACCGTCAACTGCGACCAGTTCAGC</b>  |
|              |      | Antisense | <b>AAACGCTGAACTGGTTCGCAGTTGAC</b> |
| CIITA sgRNA2 | 3    | Sense     | <b>CACCGGATATTGGCATAAGCCTCCC</b>  |
|              |      | Antisense | <b>AAACGGGAGGCTTATGCCAATATCC</b>  |
| CD58 sgRNA1  | 1    | Sense     | <b>CACCGTGGTTGCTGGGAGCGACGC</b>   |
|              |      | Antisense | <b>AAACGCGTCGCTCCCAGCAACCAC</b>   |
| CD58 sgRNA2  | 1    | Sense     | <b>CACCGGACCACGCTGAGGACCCCA</b>   |
|              |      | Antisense | <b>AAACTGGGGGTCTCAGCGTGGTCC</b>   |
| CD54 sgRNA1  | 1    | Sense     | <b>CACCGCGCACTCCTGGTCCTGCTCG</b>  |
|              |      | Antisense | <b>AAACCGAGCAGGACCAGGAGTGCGC</b>  |
| CD54 sgRNA2  | 1    | Sense     | <b>CACCGCCGAGCAGGACCAGGAGTGC</b>  |
|              |      | Antisense | <b>AAACGCACTCCTGGTCCTGCTCGGC</b>  |
| NT           | -    | Sense     | <b>CACCGATCGTTTCCGCTTAACGGCG</b>  |
|              |      | Antisense | <b>AAACCGCCGTTAAGCGGAAACGATC</b>  |

\*Bold indicates the parts within the sgRNAs that create overhangs after annealing to fit at the BsmBI

cut site in the lentiCRISPR v2 vector.

**SUPPLEMENTAL FIGURES**

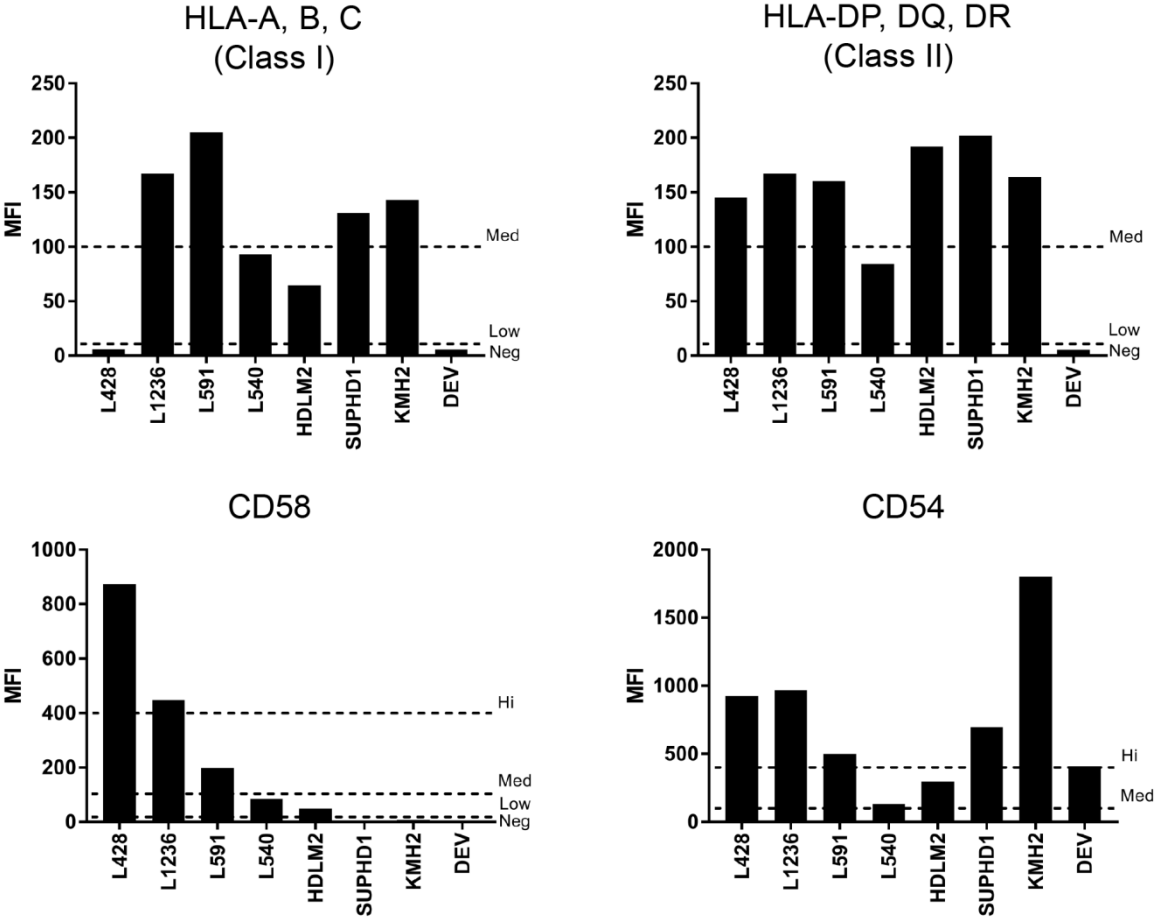

**Supplemental Figure 1. Expression of immunological synapse components on HL cell lines.** Flow cytometry analysis of cell-surface HLA class I, HLA class II, CD58 and CD54 expression in eight HL cell lines visualized by median fluorescent intensity values (MFI). Classification of negative (neg), low, medium (med) and high (hi) cell lines is based on MFI. Range: 0-10=neg; 10-100=low; 100-400=med; >400=hi.



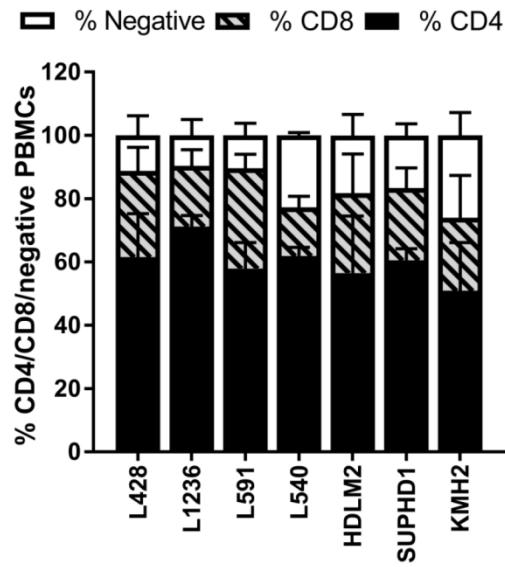

**Supplemental Figure 2. T cell composition in rosettes around different Hodgkin lymphoma cell lines using HLA-II matched PBMCs.** HL cell lines were co-cultured with HLA-II matched PBMCs for 30 minutes and the percentage of CD4+, CD8+ or CD4-CD8- cells present in rosettes was quantified using a double staining. Data are represented as mean plus standard deviation of at least three different HLA-II matched PBMC donors.

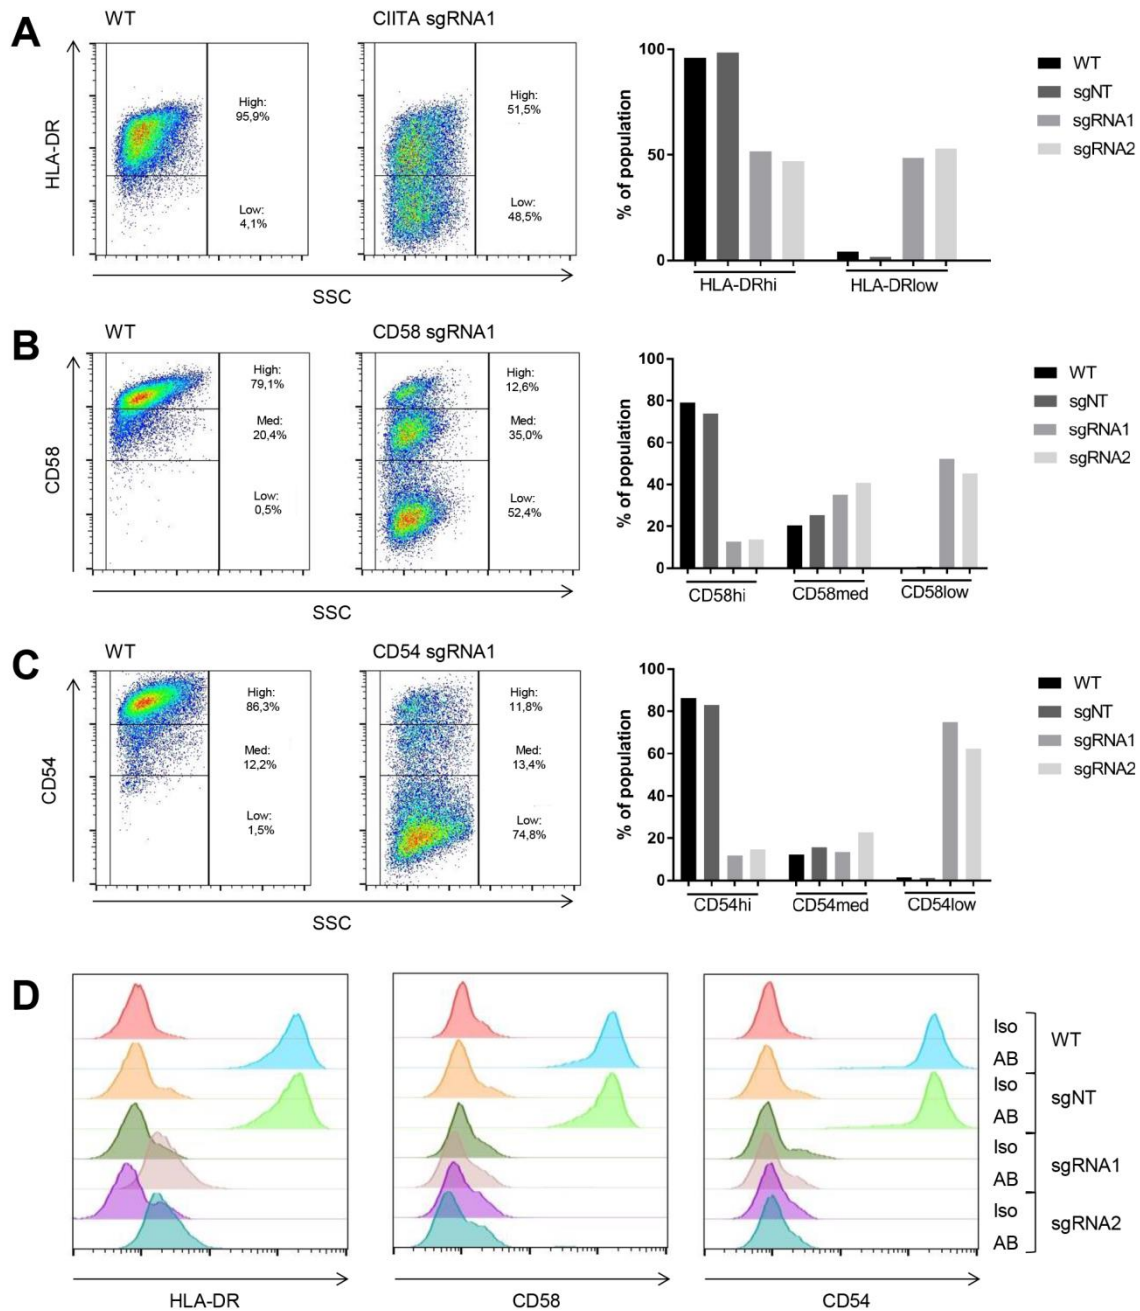

**Supplemental Figure 3. Generation of CIITA, CD58, CD54 CRISPR-Cas9 knockout L428 cell lines.** Cell surface expression of HLA-DR, CD58 and CD54 in L428 cells infected with lentiviral vectors containing two independent sgRNAs for (A) CIITA, (B) CD58 or (C) CD54. After 2-3 weeks of culture a significant proportion of the cells has reduced expression of HLA-DR, CD58 or CD54. The cells with no or low expression of the respective proteins were sorted and expanded for further studies. (D) Flow cytometry staining of HLA-DR, CD58 or CD54 (indicated by AB) of L428 wild-type (WT), NT and the knockout (KO) cell lines and controls after sorting and expansion. The sorted KO populations showed a complete KO of CD58 or CD54, while HLA-DR was strongly decreased after CIITA KO. NT cells showed no change in cell surface expression levels.

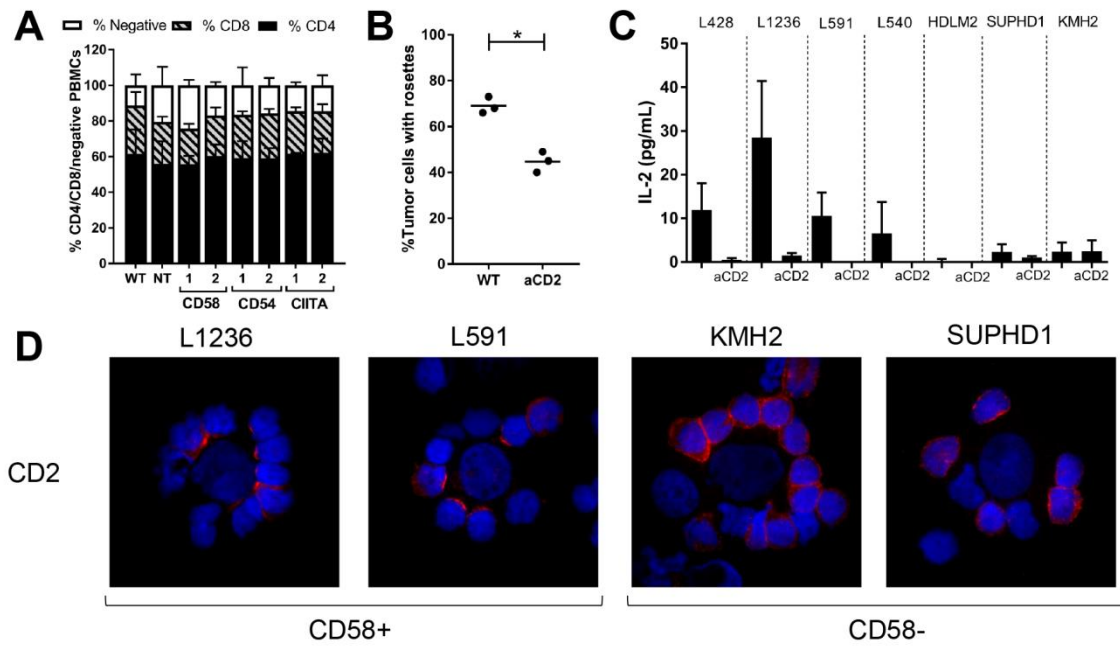

**Supplemental Figure 4. Involvement of CD58 in adhesion and activation of rosetting T cells using HLA-II matched PBMCs.**

(A) The percentages of CD4+, CD8+ and CD4-CD8- cells within the rosettes upon co-culture of L428 wild-type (WT), non-targeting (NT) control, CD58-KO, CD54-KO and CIITA-KO with HLA-II matched PBMCs for 30 minutes. Data are represented as the mean plus standard deviation of three independent donors. (B) The percentage of tumor cells with rosettes upon co-culture of L428 with untreated or anti-CD2 (aCD2) blocking antibody treated PBMCs for 30 minutes. Each dot indicates one independent HLA-II matched donor. (C) IL-2 production of matched PBMCs in response to different HL cell lines in the absence or presence of an aCD2 blocking antibody. Data are represented as the mean plus standard deviation of at least three independent donors. (D) CD2 staining (red signal) of matched PBMCs co-cultured with the CD58 positive L1236 and L591 or CD58 negative KMH2 and SUPHD1 cell lines. Nuclei were counterstained with DAPI (blue signal). Relocalization of CD2 can be observed as discrete red signals at the interface between T cells and CD58 positive tumor cells in contrast to homogenous circumferential staining of entire T cells in CD58 negative tumor cells. Representative images are shown at a 400x magnification. Statistics were calculated using a one-tailed paired t-test. Values  $P < 0.05$  were considered statistically significant. \* $P < 0.05$ .
